1 **Scaling of optogenetically evoked signaling in a higher-order**  
2 **corticocortical pathway in the anesthetized mouse**

3  
4 **Xiaojian Li<sup>1</sup>, Naoki Yamawaki<sup>1</sup>, John M. Barrett<sup>1</sup>, Konrad P. Körding<sup>1,2,3</sup>, Gordon M. G.**  
5 **Shepherd<sup>1\*</sup>**

6  
7 <sup>1</sup>Department of Physiology, Feinberg School of Medicine, Northwestern University, Chicago,  
8 Illinois, USA, 60201; <sup>2</sup>Department of Physical Medicine and Rehabilitation, Feinberg School of  
9 Medicine, Northwestern University, Chicago, Illinois, USA, 60201; <sup>3</sup>Department of  
10 Bioengineering, SEAS, UPenn, Philadelphia, PA, 19146

11 \*Correspondence: g-shepherd@northwestern.edu

12  
13 Abbreviated title: Scaling of evoked corticocortical signaling

14 Numbers: Text pages: 40. Figures: 7. Words: 220 Abstract, 619 Introduction, 1309 Discussion.

15 Conflict of interest: The authors declare no competing financial interests.

16 Acknowledgements: We thank C. Maguire and N. Bernstein for technical assistance, and D.  
17 Heeger and M. Landy for helpful discussions. Grant support: NIH (NINDS grant NS061963;  
18 NIBIB grant EB017695).

19

20 **ABSTRACT:** Quantitative analysis of corticocortical signaling is needed to understand and  
21 model information processing in cerebral networks. However, higher-order pathways,  
22 hodologically remote from sensory input, are not amenable to spatiotemporally precise activation  
23 by sensory stimuli. Here, we combined parametric channelrhodopsin-2 (ChR2) photostimulation  
24 with multi-unit electrophysiology to study corticocortical driving in a parietofrontal pathway  
25 from retrosplenial cortex (RSC) to posterior secondary motor cortex (M2) in mice *in vivo*.  
26 Ketamine anesthesia was used both to eliminate complex activity associated with the awake state  
27 and to enable stable recordings of responses over a wide range of stimulus parameters.  
28 Photostimulation of ChR2-expressing neurons in RSC, the upstream area, produced local activity  
29 that decayed quickly. This activity in turn drove downstream activity in M2 that arrived rapidly  
30 (5-10 ms latencies), and scaled in amplitude across a wide range of stimulus parameters as an  
31 approximately constant fraction ( $\sim 0.2$ ) of the upstream activity. A model-based analysis could  
32 explain the corticocortically driven activity with exponentially decaying kernels ( $\sim 20$  ms time  
33 constant) and small delay. Reverse (antidromic) driving was similarly robust. The results show  
34 that corticocortical signaling in this pathway drives downstream activity rapidly and scalably, in  
35 a mostly linear manner. These properties, identified in anesthetized mice and represented in a  
36 simple model, suggest a robust basis for supporting complex non-linear dynamic activity in  
37 corticocortical circuits in the awake state.

38

39 **SIGNIFICANCE STATEMENT:** *The signaling properties of corticocortical connections are*  
40 *not well understood, particularly for higher-order inter-areal pathways. Here, we developed a*  
41 *paradigm based on parametric optogenetic photostimulation, linear-array electrophysiology,*  
42 *and mathematical modeling to characterize signaling along corticocortical connections linking*

43 *retrosplenial cortex to posterior secondary motor cortex (M2) in anesthetized mice. The results*  
44 *indicate that corticocortically driven activity in the downstream area followed the*  
45 *optogenetically evoked upstream activity in a rapid and scalable manner, and could be described*  
46 *with a simple linear integrator model. These findings suggest that this pathway, when activated*  
47 *selectively in the unconscious state, supports intrinsically linear inter-areal communication.*

48

## 49 **INTRODUCTION**

50 Corticocortical pathways support inter-areal communication, which is central to behavior  
51 (Felleman and Van Essen, 1991; Misic and Sporns, 2016). Quantitative characterization of  
52 signaling in corticocortical pathways is essential for understanding and modeling how they  
53 contribute to information-processing. This information can also help to address a fundamental  
54 question in connectomics research, of how the relatively static structure of corticocortical  
55 networks can give rise to the complex non-linear dynamic activity typically observed in awake  
56 animals (Park and Friston, 2013). For example, it is unknown whether such non-linearities are  
57 present already at the most basic level of the intrinsic biophysical properties of corticocortical  
58 connections, or whether they arise at higher levels of network interactions.

59       Connectomics studies have identified a structural basis for many corticocortical pathways  
60 (Oh et al., 2014; Zingg et al., 2014; Jbabdi et al., 2015), and optogenetic mapping studies have  
61 begun to characterize dynamic signaling at the mesoscopic scale (Lim et al., 2012). However, the  
62 properties of inter-areal signaling in these pathways have been challenging to resolve *in vivo*,  
63 particularly in higher-order pathways, which are many synapses removed from the sensory  
64 periphery and thus difficult to analyze in an isolated, selective, and spatiotemporally precise  
65 manner with natural stimuli. Extracellular electrical stimulation has been used in efforts to

66 artificially generate focal activity, but is inherently limited due to its nonspecificity, antidromic  
67 activation, and other issues (Nowak and Bullier, 1998; Histed et al., 2009).

68       Recently developed optogenetic methods hold promise for overcoming these limitations.  
69 Such methods have enabled detailed characterization of cell-type-specific connections in long-  
70 range circuits *ex vivo* (Petreanu et al., 2007; Petreanu et al., 2009). Corticocortical circuits in  
71 mice have begun to be characterized at the cellular level with this approach (Mao et al., 2011;  
72 Hooks et al., 2013; Yang et al., 2013; Kinnischtzke et al., 2014; Petrof et al., 2015; Suter and  
73 Shepherd, 2015; Kinnischtzke et al., 2016; Sreenivasan et al., 2016), mostly focusing on lower-  
74 order corticocortical pathways that involve primary cortical areas. In parallel are efforts to use  
75 similar approaches *in vivo* to characterize how optogenetically evoked activity interacts with  
76 sensory input at the level of primary sensory cortex (e.g. (Manita et al., 2015; Reinhold et al.,  
77 2015)).

78       Among these newly characterized corticocortical circuits, however, is a higher-order  
79 projection from retrosplenial cortex (RSC) to posterior secondary motor cortex (M2) (Yamawaki  
80 et al., 2016). RSC axons innervate M2 neurons broadly across all layers and projection classes,  
81 forming a synaptic circuit whereby RSC, which receives input from dorsal hippocampal  
82 networks and is involved in spatial memory and navigation, appears to communicate with M2,  
83 which sends output to diverse motor-related areas and appears to be involved in diverse  
84 sensorimotor functions. As such, this connection is an interesting target for the reverse  
85 engineering of signaling properties in a higher-order inter-areal corticocortical pathway.

86       Here we have developed an approach based on combining the slice-based circuit analysis  
87 methods (Yamawaki et al., 2016) with system-identification methods used in sensory systems  
88 research (Wu et al., 2006) to develop an *in vivo* paradigm suitable for assessing and manipulating

89 corticocortical circuit dynamics in the intact brain. We used the same labeling paradigms to  
90 express ChR2 in presynaptic RSC neurons, and developed *in vivo* methods in the ketamine-  
91 anesthetized mouse for sampling photo-evoked multi-unit activity in M2 driven by RSC  
92 photostimulation. Duplication of the setup to permit both stimulation and recording at both ends  
93 of the RSC→M2 projection allowed a detailed parametric characterization of both local  
94 (upstream) and downstream activity evoked both ortho- and antidromically. This allowed us to  
95 systematically investigate how optogenetically evoked RSC→M2 signaling drives downstream  
96 activity as a function of upstream stimulation amplitude and duration. The parametric nature of  
97 the data collected with this approach allowed us to also assess the linearity of corticocortical  
98 signaling in this pathway.

99

## 100 **MATERIALS AND METHODS**

101

102 Animals. Studies were approved by the Northwestern University Animal Care and Use  
103 Committee, and followed the animal welfare guidelines of the Society for Neuroscience and  
104 National Institutes of Health. Wild-type mice (*Mus musculus*, C57BL/6, female and male;  
105 Jackson Laboratory, Bar Harbor, ME) were bred in-house. Mice were 6-9 weeks old at the time  
106 of *in vivo* experiments.

107

108 Stereotaxic injections. Mice under deep anesthesia underwent stereotaxic injection of adeno-  
109 associated virus (AAV) carrying ChR2 into the RSC, following standard methods as previously  
110 described (Yamawaki and Shepherd, 2015; Yamawaki et al., 2016). Viruses used were:  
111 AAV1.CAG.ChR2-Venus.WPRE.SV40 (AV-1-20071P, University of Pennsylvania Vector

112 Core, Philadelphia, PA; Addgene #20071, Addgene, Cambridge, MA), and  
113 AAV9.CamKIIa.hChR2(H134R)-eYFP.WPRE.hGH (AV-9-26969P, Penn Vector Core;  
114 Addgene #26969P). Stereotaxic coordinates for the RSC were: -1.4 mm caudal to bregma, ~0.5  
115 mm lateral to midline. To minimize cortical damage, the glass injection pipette was pulled to a  
116 fine tip, beveled to a sharp edge (Micro Grinder EG-400, Narishige, Tokyo, Japan), and  
117 advanced slowly into the cortex; injections were made slowly (over 3 minutes) at two depths (0.8  
118 and 1.2 mm from pia, ~20 nL per injection). Mice were returned to their home cages and  
119 maintained for at least 3 weeks prior to experiments, to allow time for ChR2 expression levels to  
120 rise in the infected neurons.

121  
122 Cranial hardware. Mice under deep anesthesia underwent placement of cranial mounting  
123 hardware. A small skin incision was made over the cerebellum to expose the skull, and a  
124 stainless-steel set screw (single-ended #8-32, SS8S050, Thorlabs, Newton, NJ), crimped with a  
125 spade terminal (non-insulated, 69145K438, McMaster-Carr, Elmhurst, IL), was affixed with  
126 dental cement (Jet Denture Repair Powder, Lang Dental Manufacturing Co., Inc., Wheeling, IL)  
127 to the skull. This set screw was later screwed into the tapped hole located at the top of a 1/2"  
128 optical post (Thorlabs) used for head fixation.

129  
130 In vivo circuit analysis: general procedures. Mice were anesthetized with ketamine-xylazine  
131 (ketamine 80-100 mg/kg and xylazine 5-15 mg/kg, injected intraperitoneally), placed in the  
132 recording apparatus, and head-fixed using the set screw as described above. Body temperature  
133 was monitored with a rectal probe and maintained at ~37.0 °C via feedback-controlled heating  
134 pad (FHC, Bowdoin, ME). Craniotomies were opened over the RSC and M2 using a dental drill

135 (EXL-M40, Osada, Los Angeles, CA), just large enough (~1 mm) to allow passage of the linear  
136 arrays and the tips of the optical fibers. During the subsequent recordings, ACSF (containing, in  
137 mM, 127 NaCl, 25 NaHCO<sub>3</sub>, 1.25 NaH<sub>2</sub>PO<sub>4</sub>, 2.5 KCl, 25 D-glucose; all reagents from Sigma-  
138 Aldrich, St Louis, MO) was frequently applied to the exposed brain area to prevent damage from  
139 dehydration. The level of anesthesia was continuously monitored based on paw pinching,  
140 whisker movement, and eye-blinking reflex. Additional doses of anesthesia were given  
141 subcutaneously (50% of induction dose) when required.

142

143 Photostimulation apparatus. An optical fiber (FG400AEA, multimode fiber, 0.22 NA, 400 μm  
144 core, outer diameter 550 μm with coating; Thorlabs), mounted on a motorized micromanipulator  
145 (Sutter Instrument, Novato, CA), was positioned directly over the region of the infected neurons  
146 in the RSC. The tip of the fiber was ~0.5 mm away from the surface of the brain, immersed in  
147 ACSF. In most experiments, a second fiber was similarly positioned directly over the M2. For  
148 each fiber, the light source was an LED (M470L3, Thorlabs), coupled to the fiber by an adapter  
149 (SM1SMA, Thorlabs). The power was controlled using an LED driver (LEDD1B, Thorlabs; or,  
150 driver based on RCD-24-1.00 module, RECOM Lighting, Neu-Isenburg, Germany). The output  
151 power of the LED driver was modulated by signal waveforms delivered via a multifunction  
152 analog and digital interface board (NI USB 6229; National Instruments, Austin, TX) or by a  
153 signal generator based on a 32-bit microcontroller board (Arduino Due with ARM Cortex-M3,  
154 Adafruit, New York, NY). The boards were also used to send a short pulse train to digitally  
155 encode the start and other parameters of the light waveform, sampled on the digital input port of  
156 the electrophysiology data acquisition (DAQ) board. Software tools (LabVIEW) included a GUI  
157 (GenWave) for generating and transferring the waveforms to the LED controller. The LED

158 driver was either internally software-triggered (GenWave) or externally hardware-triggered by a  
159 digital signal. A power meter was used to calibrate the relationship between input voltage to the  
160 driver and the output intensity of the fiber, and the calibration curve was used to determine the  
161 voltages (in the range of 0–5 V) corresponding to 0, 20, 40, 60, 80, and 100% of the full power  
162 (6.1 mW, measured at the tip of the optical fiber). During the experiment, analog voltages  
163 corresponding to these intensities were sent to the LED driver.

164

165 Electrophysiology apparatus. The linear arrays used were 32-channel silicon probes with ~1 MΩ  
166 impedance and 50-μm spacing (model A1×32-6mm-50-177, NeuroNexus, Ann Arbor, MI), in  
167 either “triangular” or “edge” configuration. The probes were mounted on a motorized 4-axis  
168 micromanipulator (Thorlabs MTSA1 linear translator mounted on a Sutter MP285 3-axis  
169 manipulator), and positioned under stereoscopic visualization over the M2 at cortical surface  
170 (i.e., entry point) coordinates of +0.6 mm rostral to bregma and 0.2 mm lateral to midline. The  
171 probes were tilted by ~30° off the vertical axis for alignment with the radial axis of the cortex.  
172 The probe was then slowly inserted into the cortex at a rate of 2 μm/s (controlled by software),  
173 until it reached a depth of 1600 μm from the pia. In most experiments, a second array was  
174 similarly inserted into the RSC (same stereotaxic coordinates as given above for the viral  
175 injections), except that in this case the array was inserted perpendicular to the horizontal plane,  
176 and the optical fiber was slightly tilted.

177 Signals were amplified using an amplifier board based on a RHD2132 digital  
178 electrophysiology interface chip (Intan Technologies, Los Angeles, CA). The RHD2132 chip is  
179 an analog front end that integrates the analog instrument amplifiers, filters, analog-to-digital  
180 (ADC) converters, and microcontrollers in one chip. The serial peripheral interface (SPI) port is



181 used to configure the chip and to stream the silicon probe data to the data acquisition (DAQ)  
182 board. The gain of the amplifier was fixed at  $96 \times 2 = 192$  (2-stage amplifier). The filter was set  
183 to an analog bandpass of 0.1~ 7.5K Hz with a digital filter cutoff of 1 Hz. Because the 32  
184 channels of the silicon probe inputs share the same 16 bit ADC with a multiplexer, and the  
185 maximum sample rate of the ADC is  $1.05 \times 10^6$  samples per second (SPS), the single channel  
186 sample rate was set to 30,000 SPS.

187 For hardware control, we used a RHD2000 USB Interface Evaluation Board (Intan) or  
188 DAQ board based on a breakout board with a XEM6010 USB/FPGA module (Opal Kelly,  
189 Portland, OR), a field-programmable gate array (FPGA) with many digital I/O channels for  
190 communicating with other digital devices and streaming in the linear array data from the  
191 RHD2000 amplifiers. The USB port of the module was linked with a USB cable to pipe the data  
192 stream in or out of the PC. The RHD2000 amplifier boards were connected to a DAQ board  
193 using SPI interface cables in low-voltage differential signal mode, which is well suited for  
194 communication via longer cables. In this experiment, the digital ports included in the DAQ board  
195 were only used for acquiring the LED photostimulation parameters from the LED controller.

196 For data logging, The C++/Qt based experimental interface evaluation software (Intan)  
197 was used for early stage evaluation. Then the original APIs (Rhythm USB/FPGA interface) were  
198 all rebuilt and wrapped up into a LabVIEW-based SDK. All the software, including the amplifier  
199 configuration, online visualization, data logging, and more, were developed from this SDK in  
200 LabVIEW environment.

201  
202 Trace acquisition and analysis. With the mouse anesthetized and head-fixed and the two linear  
203 arrays and two optical fibers in place, photostimuli were repeatedly delivered while continuously

204 sampling electrophysiological activity across the 32 channels per array. In each trial, a single  
205 photostimulus was delivered on one fiber, using one of the 25 combinations of stimulus  
206 intensities (20, 40, 60, 80, or 100 percent of maximum) and durations (1, 5, 10, 20, or 50 ms).  
207 Across all trials, all 25 stimulus combinations were tested, in randomly interleaved sequence,  
208 with an inter-trial (interstimulus) interval of 2 sec, This cycle was repeated many (e.g. ~30)  
209 times, and the entire process was repeated again for the second optical fiber (if present). For  
210 stimulation on each fiber, the resulting electrophysiological data set typically consisted of 2  
211 arrays x 32 channels/array x 25 stimulus parameter combinations x 30 trial repetitions = 48,000  
212 traces.

213 These trace data were stored as the raw signal from the amplifiers, and filtered as follows.  
214 A digital 60 Hz notch filter (Matlab) was used to reduce line hum. A digital high-pass filter (800  
215 Hz cut-off, 2<sup>nd</sup>-order Butterworth; Matlab) was used to isolate the higher-frequency components  
216 of the electrophysiology responses for event detection.

217 For event detection, in this study we focused on analyzing multi-unit activity; although  
218 single units could be isolated on some channels, single-unit analysis was generally hampered by  
219 the short-latency barrage of activity just after a photostimulus, particularly in the upstream area  
220 and especially at higher stimulus intensities. Similar to previous studies of multi-unit activity, we  
221 defined “events” (i.e., spikes in the traces) as voltage excursions that were  $\geq 4$  standard deviations  
222 (s.d.) above the baseline amplitude (measured in the 1500 ms prior to the stimulus), lasting  $\geq 0.1$   
223 ms (3 continuous samples) in duration. Event detection based on these criteria was performed on  
224 all traces using Matlab routines.

225 Peristimulus time histograms were constructed as follows, using Matlab (Mathworks,  
226 Natick, MA) routines. For each trial, time stamps were determined for each detected event, and

227 the time stamps of all the events of every channel were used to generate a single-trial raster plot  
228 using 1-ms bins (**Fig. 1G, top**). Trials were repeated multiple times, and raster plots were  
229 grouped by experimental condition (e.g. each particular stimulus parameter combination) and  
230 averaged over all trials (typically ~30 trials) to obtain a multi-trial histogram showing the mean  
231 activity across all channels for that condition (**Fig. 1G, middle**). The multi-trial histograms were  
232 also summed across channels to obtain an all-channel histogram for each condition (**Fig. 1G,**  
233 **bottom**).

234 The raw traces were contaminated by a brief stimulus artifact immediately after stimulus  
235 onset and offset. These transients were greatly attenuated by digital high-pass filtering (described  
236 above). The duration of the residual transients was estimated for each experiment (i.e., animal),  
237 and ranged from 1 to 3 ms. For display, both transients were simply blanked for this brief  
238 duration. For subsequent analyses, the data were replaced in the following way, taking advantage  
239 of the availability of responses recorded using different stimulus durations. For the onset  
240 transient, the event count of the blanked window was replaced by the average value of the  
241 baseline window over the 20 ms pre-stimulus interval. For the offset transient, the event count of  
242 the blanked window was replaced by the event count measured for the next-longer-duration  
243 stimulus acquisition. For example, in the case a 2-ms-long transient in the responses recorded  
244 during a 10-ms-long stimulus, the data over the interval of 11-12 ms post-stimulus (i.e., the 11<sup>th</sup>  
245 and 12<sup>th</sup> 1-ms bins) were replaced by the data value recorded at 11-12 ms during the 20-ms-long  
246 stimulus, and so on. However, for the longest-duration stimulus of 50 ms, we instead replaced  
247 with the baseline values, as post-stimulus activity had returned to approximately baseline levels  
248 by this time.

249

250 Laminar analysis. We estimated the depth of probe insertion in the cortex (and thus the cortical  
251 depth of each contact) based on the total displacement of the motorized manipulator holding the  
252 probe. In addition, because this estimate can be affected by the viscoelastic properties of brain  
253 tissue, we also routinely analyzed the electrophysiological traces to estimate the depth of  
254 insertion. For this, we calculated variance in the FFT of the voltage traces to identify the  
255 transition from low-variance exterior channels and high-variance intracortical channels. The  
256 estimated depth based on this approach matched well with the estimated depth based on images  
257 of the electrode at the site of penetration into the brain. Using this combination of approaches,  
258 the estimated probe depths were thus likely to be accurate within 50-100  $\mu\text{m}$ . Additionally, in a  
259 subset of experiments, probe tracks were labeled by coating the probe with fluorescent dye, and  
260 subsequently visualized in brain slices with epifluorescence optics to verify accurate placement  
261 of the probes in the M2 and/or RSC.

262

263 Model based analysis. We fit the following model to the locally evoked activity in RSC:

$$264 \quad A_{RSC}(t-u) = ms(t) / \left| a_0 + \sum_{\Delta t}^T s(t-\Delta t) \right|$$

265 where  $m$  is a scaling factor,  $a_0$  regulates the strength of decay,  $\Delta t$  indexes the delays over which  
266 stimulation affects activity ( $\Delta t = 0$  would be instantaneous activation),  $s(t)$  is the optical stimulus  
267 and  $u$  is the delay. The three parameters of this model  $u$ ,  $m$ , and  $a_0$  are optimized to minimize the  
268 root mean squared error (RMSE) of the model using the MATLAB `fminsearch` function.

269 We fit the following model to the downstream activity in M2:

$$270 \quad A_{M2}(t) = \mathfrak{S} \left( m \sum_{\Delta t=1}^T \frac{-\Delta t}{e^{t_{interact}}} A_{RSC}(t-\Delta t) - \theta \right) + c$$

271 where  $m$  is a scaling factor,  $\mathcal{G}(x) = 0$  for  $x < 0$  and  $\mathcal{G}(x) = x$  for  $x \geq 0$ ,  $\Delta t$  indexes the past input  
272 from RSC,  $\tau_{interact}$  is the interaction time constant,  $A_{RSC}(t)$  is the activity in area RSC,  $\theta$  is the  
273 threshold, and  $c$  is the baseline. The four parameters of this model  $c$ ,  $\theta$ ,  $\tau_{interact}$ , and  $m$  are also  
274 optimized to minimize the RMSE.

275

276 Experimental Design and Statistical Analysis. The main data set comes from an experimental  
277 design involving parametric stimulation and recording that will be explained in detail in the  
278 Results. In general, unless otherwise stated, the following statistical methods were used.  
279 Descriptive statistics are reported and displayed as sample medians  $\pm$  median absolute deviations  
280 (m.a.d.) (calculated with the Matlab function, mad.m). Group data are compared using  
281 appropriate non-parametric tests (e.g. rank sum tests for unpaired and sign tests for paired data)  
282 as indicated, with significance defined as  $p < 0.05$ .

283

## 284 **RESULTS**

285

### 286 **RSC photostimulation drives downstream M2 activity**

287 To investigate corticocortical signaling in the RSC→M2 pathway, we used viral methods to label  
288 the RSC neurons with ChR2, optical fibers to photostimulate them, and linear arrays to record  
289 the evoked activity. Similar to previous studies of this pathway (Yamawaki et al., 2016), we  
290 infected neurons in RSC with an AAV encoding ChR2 and a fluorescent protein (**Fig. 1A,B**).  
291 After a recovery period of several weeks, animals were anesthetized with ketamine and  
292 underwent placement of a photostimulation fiber over the RSC and silicon probes in both the  
293 RSC and M2 (**Fig. 1C**). (As described at the end of the Results, a second optical fiber was also

294 routinely placed over the M2 to enable antidromic activation; however, the main focus of the  
295 study is on the ‘forward’ orthodromic signaling evoked by RSC stimulation.)

296 With this optogenetic photostimulation and electrophysiological recording arrangement,  
297 we photostimulated ChR2-expressing neurons in RSC and sampled responses simultaneously in  
298 RSC (**Fig. 1D-G**) and M2 (**Fig. 1H-K**). The raw traces (**Fig. 1D,H**) were high-pass filtered (**Fig.**  
299 **1E,I**), revealing brief barrages of photo-evoked events on multiple channels on both probes,  
300 easily discernable in single trials. Over repeated trials, photostimulation reliably evoked spiking  
301 activity on channels showing responses (**Fig. 1F,J**). We analyzed the traces to detect events,  
302 representing multi-unit activity (see Methods), and used the timing of events to construct single-  
303 trial rasters and multi-trial peristimulus time histograms (**Fig. 1G,K**). These histograms showed  
304 robust, transient increases in multi-unit activity starting with a short delay after the onset of  
305 photostimulation in RSC, for both the RSC and M2 recordings. The example traces and  
306 histograms are for responses to a photostimulus with 10 ms duration and maximal intensity,  
307 extracted from a much larger data set using 25 different combinations of stimulus durations and  
308 intensities (**Fig. 1L,M**).

309 Prior to presenting our analyses of these parametric data sets in detail in later sections, we  
310 present some additional characterizations of the technique. One consideration is whether  
311 responses differ for different viruses and constructs, and we therefore performed parallel  
312 experiments with two different AAV serotypes carrying different variants of ChR2 driven by  
313 different promoters: AAV1-ChR2-Venus, carrying wild-type ChR2 driven by the CAG  
314 promoter, and AAV9-ChR2-eYFP, carrying ChR2 with the H134R mutation driven by the  
315 CaMKII promoter (see Methods). The two viruses gave very similar responses (as described in  
316 later sections), suggesting that our strategy is not overly affected by the particular types of

317 viruses and opsin constructs used. Both viruses infected cortical neurons only locally at the  
318 injection site in the RSC, without evidence of retrograde infection in M2, as shown previously  
319 (Yamawaki et al., 2016); i.e., the M2 contained anterogradely labeled axons of RSC neurons, but  
320 not retrogradely labeled somata of M2 neurons.

321         The brief burst of multi-unit activity observed in M2 (**Fig. 1I-K**) arriving shortly after  
322 that in RSC (**Fig. 1E-G**) suggests that spiking activity in RSC neurons propagated via their  
323 corticocortical axons and synaptically drove spiking activity in M2 neurons, via the abundant  
324 excitatory RSC→M2 connections previously described for this corticocortical circuit (Yamawaki  
325 et al., 2016). Alternatively, events detected in M2 might represent spikes in presynaptic axons  
326 rather than in postsynaptic neurons. However, this seems unlikely, particularly as spikes in thin  
327 corticocortical axons are much smaller in amplitude and usually difficult to detect (Raastad and  
328 Shepherd, 2003). To assess whether the M2 responses primarily reflect synaptically driven  
329 spikes of postsynaptic M2 neurons, rather than spikes in presynaptic axons, we sampled M2  
330 responses before and after injecting M2 with muscimol (100 nL, 5 mM in ACSF), a GABA  
331 agonist, which suppresses spiking in cortical neurons while preserving presynaptic spiking  
332 (Chapman et al., 1991; Chatterjee and Callaway, 2003). We also simultaneously recorded the  
333 activity in RSC, to control for the possibility that muscimol injected into M2 might diffuse to  
334 RSC. As expected, muscimol injection in M2 had no effect on activity in RSC but abolished  
335 most of the activity in M2 (**Fig. 2A**; 4 of 4 animals). A similar effect was observed when  
336 blockers of glutamatergic synaptic transmission (100 nL of 1 mM CNQX and 5 mM CPP in  
337 ACSF) were injected in M2 (1 animal). Pooling the muscimol and CNQX/ CPP data showed no  
338 effect of the drugs on RSC activity but a significant effect on M2 responses (**Fig. 2B**;  $p = 0.013$ ,

339 *t*-test,  $n = 5$ ). Injection of saline had no effect (2 of 2 animals). Thus, M2 responses appear to be  
340 primarily driven by corticocortical synaptic activity.

341 We considered the sensitivity of the results to probe placement. In earlier pilot  
342 experiments the probe was sometimes inadvertently placed slightly lateral by  $\sim 0.5$ -1 mm,  
343 resulting in recordings in M1 instead of M2. In this case we observed little or no photo-evoked  
344 activity, consistent with the anatomy and electroanatomy of the RSC→M2 projection, which  
345 provides little or no direct input to M1 neurons (Yamawaki et al., 2016). Thus, accurate probe  
346 placement is important, but inaccurate placement would simply decrease the observed activity.

347 We also considered the laminar profile of M2 activity. To estimate the depth of  
348 penetration of the silicon probes (32 channels and 50  $\mu\text{m}$  spacing), they were inserted leaving  $\sim 5$   
349 contacts out of the cortex, as verified both by viewing the site of entry with a high-power  
350 stereoscope, and assessing channel noise variance, which was low for contacts outside cortex  
351 (see Methods) (**Fig. 2C**). Group analysis ( $n = 9$  mice injected with AAV1-ChR2) indicated wide  
352 distribution of activity across channels, and thus cortical layers, albeit with a bias towards middle  
353 and deeper layers (**Fig. 2D**). Previous slice-based characterization of RSC→M2 connectivity  
354 indicated that RSC axons form monosynaptic excitatory synapses onto postsynaptic M2 neurons  
355 across all layers and major classes of projection neurons, including upper-layer neurons  
356 (Yamawaki et al., 2016). Because those experiments were performed in whole-cell voltage-  
357 clamp mode, here, to explore the cellular basis for the relatively lower activation of upper layers  
358 in M2 we performed similar brain slice experiments but with cell-attached current-clamp  
359 recordings, allowing assessment of the efficacy of RSC inputs in generating suprathreshold  
360 (spiking) activity in M2 neurons. Comparison of layer 2/3 and layer 5 neurons showed



361 significantly greater tendency of photo-activated RSC axons to generate spikes in layer 5  
362 neurons (**Fig. 2E**), consistent with the laminar profile recorded *in vivo*.

363 From the results of these initial characterizations we conclude that (i) optogenetically  
364 stimulating RSC drives a delayed, brief wave of spiking activity in M2; (ii) the evoked activity  
365 appears to reflect mostly the properties of the corticocortical circuit itself rather than the those of  
366 the viruses and/or constructs; (iii) the M2 activity appears to arise from orthodromically driven  
367 signaling along the RSC→M2 corticocortical pathway, rather than non-specific (e.g. cortex-  
368 wide) activation; and (iv) RSC drives M2 neurons across multiple layers, particularly the middle  
369 and deeper layers. Next, we turned to a more in-depth analysis of recordings made  
370 simultaneously in both cortical areas.

371

### 372 **Comparison of local RSC and downstream M2 activity evoked by RSC photostimulation**

373 Recording simultaneously from both the RSC and M2 during RSC photostimulation allowed us  
374 to assess both the locally driven activity in upstream RSC and the orthodromically driven activity  
375 in downstream M2 (**Fig. 3A**). For clarity, here we present only the data obtained using a stimulus  
376 of 100% intensity and 10 ms duration. With RSC photostimulation the activity recorded locally  
377 in RSC rose rapidly at the onset of photostimulation, peaking at approximately 5 ms, and  
378 declined rapidly as well (**Fig. 2B**). That the peak response occurred shortly after the brief post-  
379 stimulus blanking interval (from 0 to maximally 3 ms, depending on the experiment; used to  
380 eliminate a photovoltaic transient, as described in Methods) suggests that the blanking procedure  
381 affected primarily the rising phase of the response waveform. Activity recorded simultaneously  
382 in M2 (**Fig. 2C**) followed with a brief latency (7.5 ms after the RSC peak for AAV9, and 6.5 ms

383 for AAV1; **Fig. 2D,E**) and rose to lower levels than observed in RSC (RSC/M2 amplitude ratio:  
384 3.8 for AAV9, 4.1 for AAV1; **Fig. 2F**).

385 The results of this two-probe characterization of RSC photostimulation thus reveal two  
386 important aspects of corticocortical driving in this pathway. First, at the upstream end there is a  
387 rapid and strong decay of the local activity in the directly photostimulated RSC (**Fig. 2B,G**). The  
388 time course and extent of this decay are consistent with ChR2 desensitization (Nagel et al., 2003;  
389 Nagel et al., 2005; Lin et al., 2009), although other factors such as activation of interneurons and  
390 activity-dependent synaptic depression are also likely to contribute. Second, at the downstream  
391 end, the corticocortically driven activity in M2 was reduced in amplitude and slightly delayed  
392 relative to the RSC activity. A caveat is that these properties might not be generalizable,  
393 reflecting instead the particular photostimulus parameters used in these experiments. Therefore,  
394 we next investigated in detail the stimulus dependence of the responses by exploring a wide  
395 range of stimulus intensities and durations.

396

### 397 **Parametric characterization of orthodromic (forward) driving**

398 Key parameters for the dynamics of a circuit are the dependency on stimulus amplitude (light  
399 intensity) and duration (pulse width). Stimulus trials were delivered at five different intensities  
400 (20, 40, 60, 80, and 100% relative to maximum) and durations (1, 5, 10, 20, and 50 ms), with  
401 random interleaving and many repetitions (typically ~30 trials per experiment) for each of the 25  
402 unique intensity-duration combinations (**Fig. 4A**). Responses were averaged across trials as  
403 before, and the median responses on the local RSC probe (**Fig. 4B**) and the downstream M2  
404 probe (**Fig. 4C**) were determined across animals. Clearly, the evoked activity in both RSC and  
405 M2 varied with stimulus parameters. To assess how response properties might depend

406 systematically on stimulus parameters, we developed a simple model, and performed several  
407 further analyses.

408

#### 409 **A simple two-stage model captures the major features of orthodromic driving**

410 Visual inspection of the waveforms of both the RSC and M2 responses (**Fig. 4B,C**) showed  
411 roughly linear increases with intensity. Clearly, activity in the photostimulated RSC decays  
412 rapidly, consistent with ChR2 desensitization (as discussed above). However, in the  
413 downstream M2, it is unclear how responses scale with upstream RSC activity; for example, do  
414 they scale linearly, or show signs of adaptation? We would like a simple model to allow us to  
415 both describe and interpret the data.

416 Explorative data analysis revealed that we could fit the directly stimulated (upstream)  
417 area well with briefly delayed activation followed by a large and rapid decay (**Fig. 5A**). Hence,  
418 we modeled the response as a time-shifted delta function divided by a linear function of the  
419 integral of the stimulus history. So this first-stage model has 3 parameters for gain, delay, and the  
420 steady-state adaptation. These parameters seem intuitively necessary: the gain describes the  
421 strength of the locally generated activity; the delay is needed due to the ~3 ms blanking of the  
422 stimulus artifact (see Methods), but can also account for the kinetics of ChR2 activation and  
423 spike generation; and some degree of adaptation (of the locally generated activity) is expected  
424 from ChR2 inactivation/desensitization kinetics, and allows for additional factors contributing to  
425 a temporal decline in activity (e.g. GABA release, synaptic depression).

426 Indeed, we found this first-stage model to produce good fits when we analyzed activity in  
427 the stimulated (RSC) area. We find that the model qualitatively describes the data, describing  
428 both its initial peak and its decay over time (**Fig. 5B,C**). The first-stage model does not capture

429 the initial 3 ms (which were blanked), but since response amplitudes peaked later than this the  
430 model nevertheless captured the main features of the response. Moreover, the first-stage model  
431 has high  $R^2$  values on both the AAV9 (0.93) and the AAV1 (0.83) datasets. This suggests that the  
432 stimulation effect is largely described by a linear, essentially immediate translation of the ChR2-  
433 mediated depolarization into spiking activity, which decays rapidly.

434 Next, we developed a second-stage model for the corticocortical driving of M2 activity  
435 by RSC activity. Explorative data analysis revealed that activity in M2, the indirectly stimulated  
436 (downstream) area, could be fit well in terms of the activity of the stimulated area simply using  
437 thresholded activation, without an additional decay or adaptation process (**Fig. 5A**). We modeled  
438 this by convolving the upstream activity with an exponentially decaying kernel and applying a  
439 threshold. So this second-stage model has 4 parameters for gain, threshold, kernel time-constant,  
440 and baseline. These 4 parameters again seem intuitively necessary: the gain describes the  
441 strength of the corticocortically driven downstream activity; the threshold accounts for the  
442 inability of insufficiently strong upstream stimulation to produce any downstream activity; there  
443 is a slow transmission of information; and, there is non-zero baseline activity in the downstream  
444 area. Adding an explicit delay parameter to the second-stage model was not necessary: the  
445 combination of thresholding and slow stimulus integration sufficed to reproduce the  
446 experimentally observed the delay.

447 We found this second-stage model to produce good fits in the downstream (M2) area. We  
448 find that the model qualitatively describes the data, describing both its slow rise, and its  
449 subsequent decay over time (**Fig. 5D,E**). It also describes how in some conditions there is no  
450 activation whatsoever. This model also has high  $R^2$  values on both the AAV9 (0.70) and the  
451 AAV1 (0.65) datasets. The time constants of the fitted exponential kernels were on the order of a

452 few tens of milliseconds (20 ms for AAV9 and 32 ms for AAV1 data), which may include  
453 contributions from many aspects, such as synaptic current and membrane time constants. It is  
454 also comparable to the time constants of fast spike adaptation in cortical excitatory neurons (La  
455 Camera et al., 2006; Wark et al., 2007; Suter et al., 2013). Thus the bulk of the response in the  
456 downstream area, M2, is described by linear integration of the input from the upstream area,  
457 RSC, with an effect that decays exponentially over time.

458

### 459 **Analysis of orthodromically driven responses**

460 Next, we assessed whether the reduced amplitude of M2 responses (compared to upstream RSC  
461 activity, discussed above) was a consistent property across stimulus parameters. Plotting the  
462 response amplitudes in RSC and M2 for all 25 stimulus combinations (**Fig. 6A**) showed that  
463 these ranged widely but with a consistent relationship, substantially greater in RSC than in M2.  
464 The same pattern was observed for both viruses (factor of 4.7 for AAV9 and 6.8 for AAV1  
465 experiments), even though absolute response amplitudes were generally stronger for AAV9  
466 compared to AAV1 (1.5-fold for RSC responses and 2.1-fold for M2 responses;  $p < 10^{-3}$ , sign  
467 test). Overall, the ‘driving ratio’, the ratio of the remotely driven activity in M2 relative to the  
468 locally driven activity in RSC, was ~0.2 (**Fig. 6B**). In other words, activity in the downstream  
469 area, M2, was generally about a fifth of that in RSC, across a wide range of stimulus parameters.

470 Of further importance to the interaction are latencies. These also showed a consistent  
471 relationship, with M2 responses peaking with a short delay after RSC responses (**Fig. 6C**). The  
472 same pattern was observed for both viruses (median latency of M2 response relative to RSC  
473 response of 8 ms for AAV9 and 7 ms for AAV1 experiments). In this case, unlike the absolute  
474 response amplitudes, the latencies of the responses in RSC and M2 did not differ significantly for

475 AAV9 vs AAV1 ( $p > 0.05$ , sign test). In contrast to the amplitudes, the latencies were largely  
476 stimulus-independent.

477         Response amplitudes in both areas clearly varied systematically and substantially for  
478 different combinations of stimulus intensity and duration, but how? Plotting the RSC responses  
479 as a function of stimulus intensity showed a nearly linear dependence (**Fig. 6D**). In contrast,  
480 plotting the same RSC responses as a function of stimulus duration showed a sub-linear  
481 dependence (**Fig. 6E**). Applying the same analysis to the modeled traces gave qualitatively  
482 similar results (**Fig. 6D,E**, bottom row of plots). The M2 responses showed a similar, albeit  
483 noisier, set of patterns, with roughly linear intensity-dependence (**Fig. 6F**) and sub-linear  
484 duration-dependence (**Fig. 6G**). Applying the same analysis to the modeled traces again gave  
485 qualitatively similar results (**Fig. 6F,G**, bottom row of plots).

486

#### 487 **Driving in reverse: antidromic propagation**

488 The photoexcitability of ChR2-expressing axons (Petreanu et al., 2007) has previously been  
489 exploited in *in vivo* experiments to antidromically drive a trans-callosal corticocortical projection  
490 (Sato et al., 2014). Here, our experimental set-up (**Fig. 1**), by incorporating an optical fiber  
491 placed over the M2, allowed us to similarly drive the RSC→M2 projection in reverse, and  
492 thereby gain additional insight into signaling properties in this system. Characterization of  
493 antidromic optogenetic driving is additionally of technical interest both as an intended (e.g. (Sato  
494 et al., 2014)) or unintended and therefore potentially confounding effect of focal  
495 photostimulation in an area containing ChR2-expressing axons. Using the same labeling strategy  
496 (i.e., AAV-ChR2 in RSC) and recording (i.e., electrodes in both RSC and M2) arrangement, in  
497 the same experiments we also delivered photostimuli to M2 (via a second optical fiber) as a way

498 to activate ChR2-expressing axons there (i.e., projecting from RSC) and thereby gain insight into  
499 the properties of antidromic signaling in the same RSC→M2 pathways (**Fig. 7A**).

500 In particular, we wondered if antidromic activation would result in similar or different  
501 effects compared to orthodromic activation. Photostimulation in M2 (i.e., of the ChR2-  
502 expressing axons of RSC neurons) resulted in a short-latency, short-duration wave of  
503 antidromically generated activity in both RSC and a similar but smaller-amplitude wave of  
504 locally generated activity in M2 (**Fig. 7B-D**). Neither amplitudes nor latencies differed with  
505 antidromic activation for the standard (10-ms, 100% intensity) stimulus combination (**Fig. 7E,F**).  
506 However, across all stimulus combinations the response amplitudes were overall ~2-fold greater  
507 in RSC relative to M2 (**Fig. 7G**), contrasting with the reduced amplitude in the downstream area  
508 observed with orthodromic stimulation. Similar to orthodromic stimulation, absolute response  
509 amplitudes were generally stronger for AAV9 compared to AAV1 (2.6-fold for RSC responses  
510 and 3.8-fold for M2 responses;  $p < 10^{-3}$ , sign test). Latencies in the two areas were  
511 indistinguishable with AAV1 and slightly delayed (by 3 ms) in M2 with AAV9 (**Fig. 7H**).  
512 Latencies in RSC were slightly shorter with AAV9 than AAV1 (by 2.5 ms;  $p < 10^{-4}$ , sign test),  
513 but those in M2 were the same with the two viruses ( $p > 0.05$ , sign test). These results indicate  
514 that RSC axons forming this corticocortical projection can be robustly activated in M2,  
515 generating activity both locally in M2 and antidromically in RSC – which is in effect the  
516 ‘downstream’ area in this experimental configuration.

517

## 518 **DISCUSSION**

519 We analyzed corticocortical signaling in the RSC→M2 pathway *in vivo* using optogenetic  
520 photostimulation and electrophysiology. Across a wide range of stimulus parameters, the

521 downstream responses arrived rapidly and scaled systematically with the photo-evoked activity  
522 in the upstream area. We found that a simple model involving linear integration, delay, and  
523 thresholding could describe much of the data.

524 In using optogenetic photostimulation to analyze this circuit we did not attempt to mimic  
525 naturalistic activity patterns of the RSC but rather used this as a tool to drive the circuit in a  
526 highly precise, controlled manner (Miesenbock, 2009). This approach allowed us to selectively  
527 activate the upstream neurons in the RSC→M2 pathway, and to systematically vary the stimulus  
528 intensity and duration and assess whether and how response properties depended on input  
529 parameters. Focal optogenetic photostimulation differs fundamentally from non-specific methods  
530 for brain stimulation; extracellular electrical stimulation, for example, is inherently limited due to  
531 its nonspecificity, antidromic activation, and related issues (Histed et al., 2009; Joucla et al.,  
532 2012) and could not have been used to selectively study signaling in the RSC→M2 pathway.

533 Another artificial aspect of these experiments was the use of anesthesia, without which  
534 extensive parametric testing would have been challenging with head-fixed animals. Moreover,  
535 our studies focused on computational aspects of corticocortical population signaling, not how  
536 corticocortical signals relate to the high-dimensional aspects of behavior (Carandini, 2012). In  
537 awake animals, even “at rest” the patterns of functional connectivity in the cortex can be  
538 extremely complex and dissimilar to anatomical connectivity, whereas in anesthetized animals  
539 the structure-function correspondence is high (Barttfeld et al., 2015). Reduced complexity in the  
540 anesthetized state could reflect reduction of non-linearities of corticocortical signaling.  
541 Consistent with this possibility, ketamine anesthesia (used here) blocks NMDA receptors and  
542 other molecules involved in highly non-linear forms of signaling in cortical neurons (Antic et al.,  
543 2010; Sleight et al., 2014). Our findings indicate highly linear signaling in the RSC→M2



544 corticocortical pathway in ketamine-anesthetized mice. Thus, one interpretation of our findings  
545 is that such signaling represents a kind of “ground state” for corticocortical communication in  
546 this pathway. We suggest that this simpler, linear mode of corticocortical signaling can serve as a  
547 robust basis for complex dynamic activity to emerge when non-linear mechanisms are active in  
548 the awake state. Further experiments will be needed to explore such speculations.

549         We found that a simple two-stage model captured the broad features of the data. At the  
550 upstream end, the conversion of light energy into local spiking activity in the upstream area (the  
551 RSC) could be described as a simple transfer function dominated by strong and rapid decay. The  
552 decay likely reflects primarily ChR2 desensitization, a property common to all ChR2 variants  
553 including the two used here (Nagel et al., 2003; Nagel et al., 2005; Lin et al., 2009). Additional  
554 components of the decay may have come from endogenous factors associated with the neurons  
555 and microcircuits in the locally stimulated area (e.g. GABA release from inhibitory interneurons,  
556 short-term synaptic depression). One potential application of this first-stage model of the local  
557 photoactivation process is that it could be used to design photostimuli that precisely compensate  
558 for the decay.

559         At the downstream end, the conversion of upstream activity (in RSC) into downstream  
560 activity (in M2) could be described by a simple exponential process with a brief delay, and no  
561 adaptation mechanism. Although a small non-linearity was included in the form of a threshold,  
562 the efficacy of the second-stage model suggests that corticocortical signaling is mostly linear.  
563 The efficacy of this model implies that corticocortical driving of downstream activity is highly  
564 scalable, and furthermore that adaptation (of corticocortical driving) is not a major factor in  
565 shaping the downstream response, at least on the short time scales (tens of milliseconds) studied  
566 here. However, some contribution of an adaptation process may be reflected in the early

567 component of the responses, which tend to be larger than the fitted traces. Whether this simple  
568 model can describe corticocortical signaling in other inter-areal pathways remains to be  
569 determined, but similarities between our findings using optogenetic activation and related work  
570 in the visual system (e.g. (Carandini et al., 1997)) suggest this is plausible.

571         The scalability of corticocortical signaling observed here may be particular to the  
572 RSC→M2 pathway, or may represent a more general computational principle of cortical  
573 operation (Miller, 2016; Rolls, 2016). Although cortical circuit organization appears basically  
574 conserved, areas can also differ substantially in their quantitative properties (Harris and  
575 Shepherd, 2015). Corticocortical signaling in other pathways might therefore be expected to  
576 exhibit broadly similar scalability, but with pathway-specific differences in the details of  
577 spatiotemporal dynamics. The ability to capture both general and pathway-specific features of  
578 corticocortical signaling in a simple mathematical model suggests a utility of this approach both  
579 for theoretical approaches to cortical network modeling (Bassett and Sporns, 2017) and for  
580 neural engineering approaches in which closed-loop neural dynamics and behavioral control  
581 require predictive modeling (Grosenick et al., 2015). Further studies will be needed to test these  
582 speculations.

583         The downstream response latencies (~8 ms after upstream responses), together with the  
584 RSC-M2 inter-areal distance of ~2 mm and allowing for the timing of synaptic transmission  
585 (Sabatini and Regehr, 1999), implies a conduction speed for these RSC→M2 corticocortical  
586 axons on the order of 0.3 m/s, a typical value for thin unmyelinated cortical axons (Raastad and  
587 Shepherd, 2003). The consistency of the latency timing across different stimulus parameters  
588 suggests that the RSC→M2 circuit was activated in a similar manner independent of the  
589 particular activity level of the RSC neurons; in particular, this suggests that the M2 activity

590 resulted from direct excitatory RSC input to M2 neurons, rather than polysynaptic pathways via  
591 posterior parietal cortex or anterior thalamus (Yamawaki et al., 2016) or hippocampus (Sugar et  
592 al., 2011). Had polysynaptic interactions been increasingly engaged by longer-duration stimuli,  
593 responses should have increased over time in both RSC and M2, not decreased as observed.

594 In addition to robust forward (orthodromic) activation, we found robust reverse  
595 (antidromic) corticocortical signaling in RSC→M2 circuits. Antidromic driving, evoked by  
596 stimulating in M2 the ChR2-labeled axons projecting from RSC, was notable for two distinct  
597 properties. First, photostimulation in M2 (of the ChR2-expressing axons of RSC neurons)  
598 generated even more activity in RSC than in M2, by a factor of ~2. Thus, the gain in this  
599 corticocortical circuit (ratio of downstream to upstream activity) appeared to be a property  
600 associated with the anatomical directionality of the projection (RSC→M2), rather than  
601 determined by the site of stimulation. The greater activity in RSC could reflect locally abundant  
602 axonal branches of the labeled RSC neurons. Second, the efficiency of information transmission  
603 appeared similar in either direction; i.e., a property associated with the site of stimulation rather  
604 than the anatomical directionality of the projection. Optogenetic antidromic activation has been  
605 previously exploited used as a way to selectively generate activity in an area (e.g. (Sato et al.,  
606 2014)). Our results thus not only provide an additional example of how a corticocortical pathway  
607 can be driven in reverse to remotely generate activity in an area of interest, but identify key  
608 similarities as well as differences compared to orthodromic driving.

609 Corticocortical signaling in the RSC→M2 pathway may be critical for conveying  
610 information from hippocampus-associated networks involved in spatial memory and navigation  
611 to cortical and subcortical networks involved in decision making and action planning and  
612 execution (Vann et al., 2009; Sugar et al., 2011; Yamawaki et al., 2016). Consistent with this,

613 lesions of the RSC impair navigation without impairing either motor function or the ability to  
614 recognize navigational landmarks (Maguire, 2001), and RSC pathology can be an early and  
615 prominent feature of Alzheimer's disease (Minoshima et al., 1997). Conversely, the RSC→M2  
616 connectivity appears strengthened after damage to adjacent cortex in a mouse stroke model  
617 (Brown et al., 2009). Thus another potential application of experimental-theoretical paradigm  
618 developed here is to understand primary pathology and adaptive plasticity in corticocortical  
619 signaling in mouse models of disease.

620

## 621 REFERENCES

622

- 623 Antic SD, Zhou WL, Moore AR, Short SM, Ikonomu KD (2010) The decade of the dendritic  
624 NMDA spike. *J Neurosci Res* 88:2991-3001. doi:10.1002/jnr.22444
- 625 Barttfeld P, Uhrig L, Sitt JD, Sigman M, Jarraya B, Dehaene S (2015) Signature of  
626 consciousness in the dynamics of resting-state brain activity. *Proc Natl Acad Sci U S A*  
627 112:887-892. doi:10.1073/pnas.1418031112
- 628 Bassett DS, Sporns O (2017) Network neuroscience. *Nat Neurosci* 20:353-364.  
629 doi:10.1038/nn.4502
- 630 Brown CE, Aminoltehari K, Erb H, Winship IR, Murphy TH (2009) In vivo voltage-sensitive dye  
631 imaging in adult mice reveals that somatosensory maps lost to stroke are replaced over  
632 weeks by new structural and functional circuits with prolonged modes of activation  
633 within both the peri-infarct zone and distant sites. *J Neurosci* 29:1719-1734.  
634 doi:10.1523/JNEUROSCI.4249-08.2009

- 635 Carandini M (2012) From circuits to behavior: a bridge too far? *Nat Neurosci* 15:507-509.  
636 doi:10.1038/nn.3043
- 637 Carandini M, Heeger DJ, Movshon JA (1997) Linearity and normalization in simple cells of the  
638 macaque primary visual cortex. *J Neurosci* 17:8621-8644.
- 639 Chapman B, Zahs KR, Stryker MP (1991) Relation of cortical cell orientation selectivity to  
640 alignment of receptive fields of the geniculocortical afferents that arborize within a single  
641 orientation column in ferret visual cortex. *J Neurosci* 11:1347-1358.
- 642 Chatterjee S, Callaway EM (2003) Parallel colour-opponent pathways to primary visual cortex.  
643 *Nature* 426:668-671. doi:10.1038/nature02167
- 644 Felleman DJ, Van Essen DC (1991) Distributed hierarchical processing in the primate cerebral  
645 cortex. *Cereb Cortex* 1:1-47.
- 646 Grosenick L, Marshel JH, Deisseroth K (2015) Closed-loop and activity-guided optogenetic  
647 control. *Neuron* 86:106-139. doi:10.1016/j.neuron.2015.03.034
- 648 Harris KD, Shepherd GM (2015) The neocortical circuit: themes and variations. *Nat Neurosci*  
649 18:170-181. doi:10.1038/nn.3917
- 650 Histed MH, Bonin V, Reid RC (2009) Direct activation of sparse, distributed populations of  
651 cortical neurons by electrical microstimulation. *Neuron* 63:508-522.  
652 doi:10.1016/j.neuron.2009.07.016
- 653 Hooks BM, Mao T, Gutnisky D, Yamawaki N, Svoboda K, Shepherd GMG (2013) Organization  
654 of cortical and thalamic input to pyramidal neurons in mouse motor cortex. *J Neurosci*  
655 33:748-760. doi:10.1523/JNEUROSCI.4338-12.2013
- 656 Jbabdi S, Sotiropoulos SN, Haber SN, Van Essen DC, Behrens TE (2015) Measuring  
657 macroscopic brain connections in vivo. *Nat Neurosci* 18:1546-1555. doi:10.1038/nn.4134

- 658 Joucla S, Branchereau P, Cattaert D, Yvert B (2012) Extracellular neural microstimulation may  
659 activate much larger regions than expected by simulations: a combined experimental and  
660 modeling study. *PLoS One* 7:e41324. doi:10.1371/journal.pone.0041324
- 661 Kinnischtzke AK, Simons DJ, Fanselow EE (2014) Motor cortex broadly engages excitatory and  
662 inhibitory neurons in somatosensory barrel cortex. *Cereb Cortex* 24:2237-2248.  
663 doi:10.1093/cercor/bht085
- 664 Kinnischtzke AK, Fanselow EE, Simons DJ (2016) Target-specific M1 inputs to infragranular S1  
665 pyramidal neurons. *J Neurophysiol* 116:1261-1274. doi:10.1152/jn.01032.2015
- 666 La Camera G, Rauch A, Thurbon D, Luscher HR, Senn W, Fusi S (2006) Multiple time scales of  
667 temporal response in pyramidal and fast spiking cortical neurons. *J Neurophysiol*  
668 96:3448-3464. doi:10.1152/jn.00453.2006
- 669 Lim DH, Mohajerani MH, Ledue J, Boyd J, Chen S, Murphy TH (2012) In vivo large-scale  
670 cortical mapping using channelrhodopsin-2 stimulation in transgenic mice reveals  
671 asymmetric and reciprocal relationships between cortical areas. *Front Neural Circuits*  
672 6:11. doi:10.3389/fncir.2012.00011
- 673 Lin JY, Lin MZ, Steinbach P, Tsien RY (2009) Characterization of engineered channelrhodopsin  
674 variants with improved properties and kinetics. *Biophys J* 96:1803-1814.  
675 doi:10.1016/j.bpj.2008.11.034
- 676 Maguire EA (2001) The retrosplenial contribution to human navigation: a review of lesion and  
677 neuroimaging findings. *Scandinavian journal of psychology* 42:225-238.
- 678 Manita S, Suzuki T, Homma C, Matsumoto T, Odagawa M, Yamada K, Ota K, Matsubara C,  
679 Inutsuka A, Sato M, Ohkura M, Yamanaka A, Yanagawa Y, Nakai J, Hayashi Y, Larkum

- 680 ME, Murayama M (2015) A Top-Down Cortical Circuit for Accurate Sensory  
681 Perception. *Neuron* 86:1304-1316. doi:10.1016/j.neuron.2015.05.006
- 682 Mao T, Kusefoglou D, Hooks BM, Huber D, Petreanu L, Svoboda K (2011) Long-range neuronal  
683 circuits underlying the interaction between sensory and motor cortex. *Neuron* 72:111-  
684 123. doi:10.1016/j.neuron.2011.07.029
- 685 Miesenbock G (2009) The optogenetic catechism. *Science* 326:395-399.  
686 doi:10.1126/science.1174520
- 687 Miller KD (2016) Canonical computations of cerebral cortex. *Curr Opin Neurobiol* 37:75-84.  
688 doi:10.1016/j.conb.2016.01.008
- 689 Minoshima S, Giordani B, Berent S, Frey KA, Foster NL, Kuhl DE (1997) Metabolic reduction  
690 in the posterior cingulate cortex in very early Alzheimer's disease. *Ann Neurol* 42:85-94.  
691 doi:10.1002/ana.410420114
- 692 Misic B, Sporns O (2016) From regions to connections and networks: new bridges between brain  
693 and behavior. *Curr Opin Neurobiol* 40:1-7. doi:10.1016/j.conb.2016.05.003
- 694 Nagel G, Brauner M, Liewald JF, Adeishvili N, Bamberg E, Gottschalk A (2005) Light  
695 activation of channelrhodopsin-2 in excitable cells of *Caenorhabditis elegans* triggers  
696 rapid behavioral responses. *Curr Biol* 15:2279-2284. doi:10.1016/j.cub.2005.11.032
- 697 Nagel G, Szellas T, Huhn W, Kateriya S, Adeishvili N, Berthold P, Ollig D, Hegemann P,  
698 Bamberg E (2003) Channelrhodopsin-2, a directly light-gated cation-selective membrane  
699 channel. *Proc Natl Acad Sci U S A* 100:13940-13945. doi:10.1073/pnas.1936192100
- 700 Oh SW et al. (2014) A mesoscale connectome of the mouse brain. *Nature* 508:207-214.  
701 doi:10.1038/nature13186

- 702 Park HJ, Friston K (2013) Structural and functional brain networks: from connections to  
703 cognition. *Science* 342:1238411. doi:10.1126/science.1238411
- 704 Petreanu L, Huber D, Sobczyk A, Svoboda K (2007) Channelrhodopsin-2-assisted circuit  
705 mapping of long-range callosal projections. *Nat Neurosci* 10:663-668.  
706 doi:10.1038/nn1891
- 707 Petreanu L, Mao T, Sternson SM, Svoboda K (2009) The subcellular organization of neocortical  
708 excitatory connections. *Nature* 457:1142-1145. doi:10.1038/nature07709
- 709 Petrof I, Viaene AN, Sherman SM (2015) Properties of the primary somatosensory cortex  
710 projection to the primary motor cortex in the mouse. *J Neurophysiol* 113:2400-2407.  
711 doi:10.1152/jn.00949.2014
- 712 Raastad M, Shepherd GM (2003) Single-axon action potentials in the rat hippocampal cortex. *J*  
713 *Physiol* 548:745-752. doi:10.1113/jphysiol.2002.032706
- 714 Reinhold K, Lien AD, Scanziani M (2015) Distinct recurrent versus afferent dynamics in cortical  
715 visual processing. *Nat Neurosci* 18:1789-1797. doi:10.1038/nn.4153
- 716 Rolls ET (2016) *Cerebral Cortex: Principles of Operation*. Oxford: Oxford University Press.
- 717 Sabatini BL, Regehr WG (1999) Timing of synaptic transmission. *Annu Rev Physiol* 61:521-  
718 542. doi:10.1146/annurev.physiol.61.1.521
- 719 Sato TK, Hausser M, Carandini M (2014) Distal connectivity causes summation and division  
720 across mouse visual cortex. *Nat Neurosci* 17:30-32. doi:10.1038/nn.3585
- 721 Sleigh J, Harvey M, Voss L, Denny B (2014) Ketamine - more mechanisms of action than just  
722 NMDA blockade. *Trends in Anaesthesia and Critical Care* 4:76-81.



- 723 Sreenivasan V, Esmaeili V, Kiritani T, Galan K, Crochet S, Petersen CC (2016) Movement  
724 initiation signals in mouse whisker motor cortex. *Neuron* 92:1368-1382.  
725 doi:10.1016/j.neuron.2016.12.001
- 726 Sugar J, Witter MP, van Strien NM, Cappaert NL (2011) The retrosplenial cortex: intrinsic  
727 connectivity and connections with the (para)hippocampal region in the rat. An interactive  
728 connectome. *Front Neuroinform* 5:7. doi:10.3389/fninf.2011.00007
- 729 Suter BA, Shepherd GMG (2015) Reciprocal interareal connections to corticospinal neurons in  
730 mouse m1 and s2. *J Neurosci* 35:2959-2974. doi:10.1523/JNEUROSCI.4287-14.2015
- 731 Suter BA, Migliore M, Shepherd GMG (2013) Intrinsic electrophysiology of mouse  
732 corticospinal neurons: a class-specific triad of spike-related properties. *Cerebral Cortex*  
733 23:1965-1977. doi:10.1093/cercor/bhs184
- 734 Vann SD, Aggleton JP, Maguire EA (2009) What does the retrosplenial cortex do? *Nat Rev*  
735 *Neurosci* 10:792-802. doi:10.1038/nrn2733
- 736 Wark B, Lundstrom BN, Fairhall A (2007) Sensory adaptation. *Curr Opin Neurobiol* 17:423-  
737 429. doi:10.1016/j.conb.2007.07.001
- 738 Wu MC, David SV, Gallant JL (2006) Complete functional characterization of sensory neurons  
739 by system identification. *Annu Rev Neurosci* 29:477-505.  
740 doi:10.1146/annurev.neuro.29.051605.113024
- 741 Yamawaki N, Shepherd GMG (2015) Synaptic circuit organization of motor corticothalamic  
742 neurons. *J Neurosci* 35:2293-2307. doi:10.1523/JNEUROSCI.4023-14.2015
- 743 Yamawaki N, Radulovic J, Shepherd GM (2016) A corticocortical circuit directly links  
744 retrosplenial cortex to M2 in the mouse. *J Neurosci* 36:9365-9374.  
745 doi:10.1523/JNEUROSCI.1099-16.2016

746 Yang W, Carrasquillo Y, Hooks BM, Nerbonne JM, Burkhalter A (2013) Distinct balance of  
747 excitation and inhibition in an interareal feedforward and feedback circuit of mouse  
748 visual cortex. *J Neurosci* 33:17373-17384. doi:10.1523/JNEUROSCI.2515-13.2013

749 Zingg B, Hintiryan H, Gou L, Song MY, Bay M, Bienkowski MS, Foster NN, Yamashita S,  
750 Bowman I, Toga AW, Dong HW (2014) Neural networks of the mouse neocortex. *Cell*  
751 156:1096-1111. doi:10.1016/j.cell.2014.02.023

752

753

## 754 **FIGURES**

755

756 **Figure 1. Experimental paradigm for characterizing inter-areal signaling in the**  
757 **corticocortical projection from retrosplenial (RSC) to posterior secondary motor (M2)**  
758 **cortex.**

759 (A) Virus injection in RSC infects somata at the injection site, resulting in anterograde labeling  
760 of RSC axons projecting to M2. Right: epifluorescence image of the dorsal surface of the brain  
761 of an anesthetized mouse, showing labeled axons projecting from RSC to posterior M2.

762 (B) Coronal brain slices showing labeled axons in M2, and the track of a dye-coated linear array.  
763 Left: bright-field image. M2 is between the primary motor (M1) and anterior cingulate (AC)  
764 cortices. Right: epifluorescence image, showing labeled axons from RSC within M2, and the  
765 track of a dye-coated linear array (probe) that had been inserted in M2.

766 (C) Depiction of experimental set-up showing aspects of the hardware control apparatus and  
767 wiring. An optical fiber (blue) was placed over, and a silicon probe was inserted into, each of the

768 two cortical areas. The optical fibers were coupled to blue light-emitting diodes (LEDs). For  
769 clarity, only the fiber over the RSC is depicted here. See Methods for additional details.

770 (D-G) Examples of RSC recordings during RSC photostimulation.

771 (D) Raw (unfiltered) traces from the 32-channel linear array in the RSC, recorded during a single  
772 trial of RSC photostimulation (10 ms pulse, 100% intensity). The stimulus is indicated by the bar  
773 above, and by the blue box. The interior line within the box indicates the 3-ms post-stimulus  
774 time point, which was the maximal width of the responses that were blanked to eliminate a  
775 stimulus artifact. The region demarcated by the black box is shown in the inset at the bottom.

776 (E) Same, but after high-pass filtering.

777 (F) Traces from a single channel, recorded on multiple stimulus presentations. Photostimulation  
778 reliably generated post-stimulus activity.

779 (G) Top: Raster plot of detected events for a single trial (traces shown in E). Middle: Histogram  
780 showing events detected across all trials for each channel. Bottom: Overall histogram, calculated  
781 by summing across all channels.

782 (H-K) Same as D-G, for the recordings made simultaneously from the linear array inserted in  
783 M2.

784 (L) Histograms for the RSC recordings, for 25 combinations of stimulus durations (1, 5, 10, 20,  
785 and 50 ms) and intensities (20, 40, 60, 80, and 100% of maximum).

786 (M) Same, for the M2 recordings.

787

788 **Figure 2. Additional characterizations of the technique.**

789 (A) Example histograms for responses to RSC stimulation, recorded before and after injection  
790 into M2 of muscimol. Muscimol, which suppresses synaptically driven activity, greatly reduced  
791 downstream activity in M2 (right) but not in RSC (left).

792 (B) Responses recorded before and after injection into M2 of muscimol, CNQX/PPP, or ACSF  
793 (see legend for symbols). Drug injection did not affect activity in RSC (left) but significantly  
794 reduced responses in M2 (right;  $p = 0.013$ ,  $t$ -test,  $n = 5$ ). Colors indicate different experiments  
795 (animals).

796 (C) Left: Image of 32-channel silicon probe, taken through the ocular of a stereoscope, showing  
797 5 visible contacts above the penetration site into the cortex. Distance between contacts is 50  $\mu\text{m}$ .  
798 Right: Plot of the variance in the FFT of the traces collected on the first 20 channels of the probe,  
799 showing an abrupt increase for channels deeper than the 6<sup>th</sup> contact (dashed line).

800 (D) Left: Average peristimulus-time histogram across all channels in a 32-channel array in M2  
801 during RSC photostimulation, plotted on a color scale (mean  $\pm$  s.e.m., for  $n = 9$  mice injected  
802 with AAV1-ChR2). Right: Average laminar profile, plotted as the average event rate per channel  
803 during the response interval (red) and baseline (blue).

804 (E) In *ex vivo* brain slice experiments, cell-attached recordings were made from layer 2/3 and  
805 layer 5B neurons while photostimulating RSC axons. Left: Example traces showing spiking  
806 response in the layer 5B neuron. Right: The mean number of evoked spikes was calculated for  
807 each neuron, and plotted as a cumulative histogram of spike probability. Layer 5B neurons  
808 spiked significantly more than layer 2/3 neurons ( $p = 0.009$ , rank-sum test; median spikes were 0  
809 vs 1 for layer 2/3 vs 5B, respectively;  $n = 15$  layer 2/3 and 15 layer 5B neurons).

810

811 **Figure 3. Comparison of local RSC and downstream M2 activity evoked by RSC**  
812 **photostimulation.**

813 (A) Experimental paradigm: RSC neurons were infected with AAV to express ChR2, and  
814 photostimuli were applied to RSC while recording multi-unit activity in both M2  
815 (orthodromically driven) and RSC (locally driven).

816 (B) Activity recorded on the RSC probe during RSC stimulation in animals injected with AAV9-  
817 ChR2. Red trace is the median response across 6 animals (traces for each animal shown in gray).

818 (C) Activity recorded on the M2 probe during the same experiment. Blue trace is the median  
819 response across animals.

820 (D) Overall activity on the RSC and M2 probes plotted together (peak-normalized).

821 (E) Latencies (to peak) for responses recorded on the RSC and M2 probes. P-value calculated by  
822 2-sided, paired sign test.

823 (F) Amplitudes of responses (summed events) recorded on the RSC and M2 probes, plotted for  
824 each experiment (gray) and as the median across animals (blue). P-value calculated by 2-sided,  
825 paired sign test.

826

827 **Figure 4. Parametric characterization of orthodromic (forward) driving.**

828 (A) Light pulses with a total of 25 different combinations of stimulus intensities (20, 40, 60, 80,  
829 and 100% relative to maximum) and durations (1, 5, 10, 20, and 50 ms) were used to  
830 photostimulate the RSC.

831 (B) Activity recorded locally in RSC (red) in response to RSC photostimulation using the stimuli  
832 shown in panel A. Each trace is the median response across AAV9-ChR2 animals ( $n = 6$   
833 experiments).

834 (C) Activity recorded simultaneously in M2 (green) in the same experiments.

835

836 **Figure 5. A simple two-stage model captures the major features of orthodromic driving.**

837 (A) Depiction of the modeling. The first stage is the conversion of light pulses into local activity  
838 in the RSC, which is modeled by convolving the step pulses of light with a step function scaled  
839 by a decay process. The second stage is the conversion of the upstream RSC activity into  
840 downstream M2 activity, which is modeled by convolving the RSC activity with an exponential  
841 process with a temporal lag. The models were fitted to the data over the 0-60 ms post-stimulus  
842 interval. See text for additional details.

843 (B) The fitted RSC responses (red) were generated by modeling the light pulse→RSC transfer  
844 function as described in panel A. The AAV9 data traces (gray) are shown superimposed.

845 (C) Plot of the residuals (black trace), calculated by subtracting the mean fitted traces (red) from  
846 the mean data traces (gray).

847 (D) The fitted M2 responses (green) were generated by modeling the RSC→M2 transfer function  
848 as described in panel A. The data traces (gray) are shown superimposed.

849 (E) Plot of the residuals (black trace), calculated by subtracting the mean fitted traces (green)  
850 from the mean data traces (gray).

851

852 **Figure 6. Analysis of orthodromically driven response amplitudes and latencies.**

853 (A) Amplitudes (calculated as the summed events) of the responses recorded on the RSC and M2  
854 probes during RSC photostimulation, for each of the 25 combinations of stimulus intensity and  
855 duration (gray) along with the median values (blue), plotted for AAV9 experiments (see text for  
856 AAV1 results). *P*-values calculated by 2-sided, paired sign test.

857 (B) Driving ratios (defined as the ratio of activity generated locally in RSC over that generated  
858 remotely in M2) plotted as the median (across the 25 stimulus parameter combinations)  $\pm$  m.a.d.

859 (C) Same as panel A, but for latencies.

860 (D) Dependence of RSC responses on stimulus intensity and duration. Left, top: For the RSC  
861 recordings, response amplitudes are plotted as a function of stimulus intensity; each line is for  
862 data recorded at constant stimulus duration, as indicated. Left, bottom: Same analysis, for the  
863 modeled responses. Right plots: same curves but peak-normalized. Response amplitudes grew  
864 approximately linearly with stimulus intensity.

865 (E) Same analyses as panel D, but showing responses as a function of stimulus duration.  
866 Response amplitudes grew sub-linearly (approximately logarithmically) with stimulus duration.

867 (F–G) Same as panels D–E, but for M2 recordings.

868

869 **Figure 7. Driving in reverse: antidromic propagation.**

870 (A) Experimental paradigm: RSC neurons were infected with AAV to express ChR2, and  
871 photostimuli were applied to M2 (to stimulate axons of RSC neurons) while recording multi-unit  
872 activity in both M2 (locally driven) and RSC (antidromically driven).

873 (B) Activity recorded on the RSC probe during RSC stimulation in an animal injected with  
874 AAV9-ChR2. Red trace is the median response across animals (traces for each animal shown in  
875 gray).

876 (C) Activity recorded on the M2 probe during the same experiment. Blue trace is the median  
877 response across animals.

878 (D) Overall activity on the RSC and M2 probes plotted together (peak-normalized).

879 (E) Amplitudes of responses (summed events) recorded on the RSC and M2 probes, for the same  
880 stimulus parameter combination (10-ms duration, 100% intensity) used for the data shown in  
881 panels B-D, plotted for each experiment (gray) and as the median across animals (blue). *P*-value  
882 calculated by 2-sided, paired sign test.

883 (F) Latencies (to peak) for responses recorded on the RSC and M2 probes (same stimulus).

884 (G) Response amplitudes across all 25 stimulus parameter combinations (gray), with the overall  
885 median (blue), plotted for AAV9 experiments (see text for AAV1 results). Right: Driving ratio  
886 (defined as the ratio of activity generated locally in RSC over that generated remotely in M2)  
887 plotted as the median (across the 25 stimulus parameter combinations)  $\pm$  m.a.d. Scaling of  
888 vertical axes is set to facilitate comparison to similar plots in Fig. 6.

889 (H) Same, for latencies.



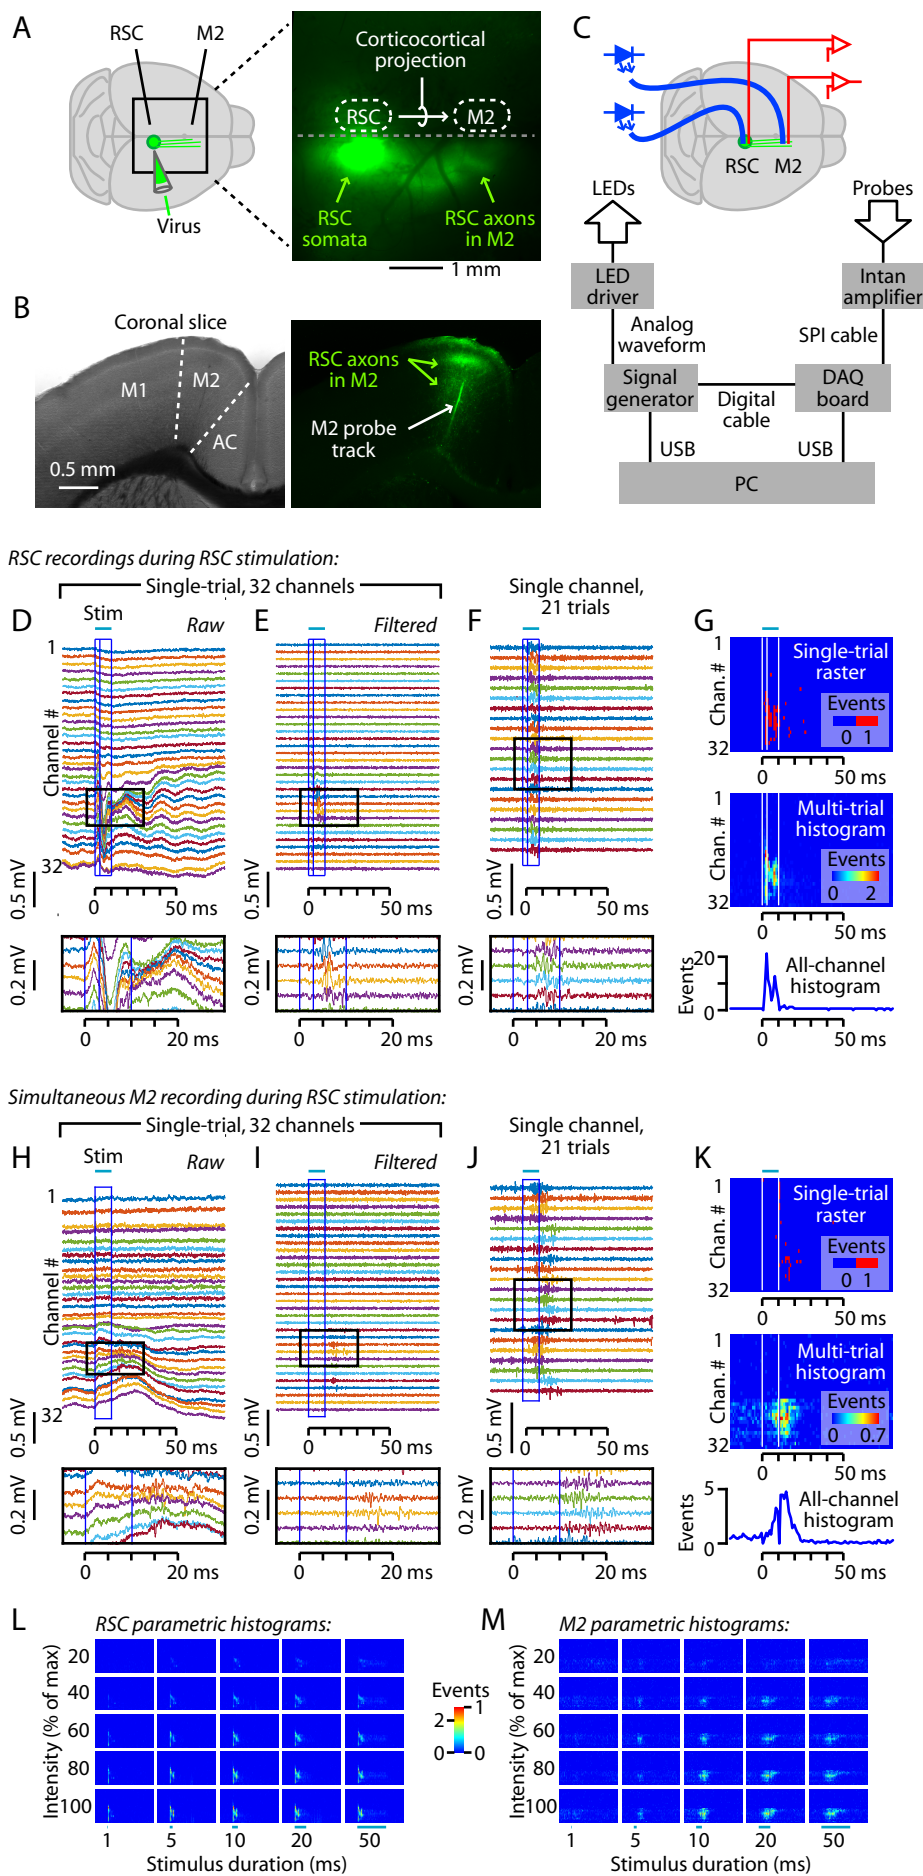

Figure 1

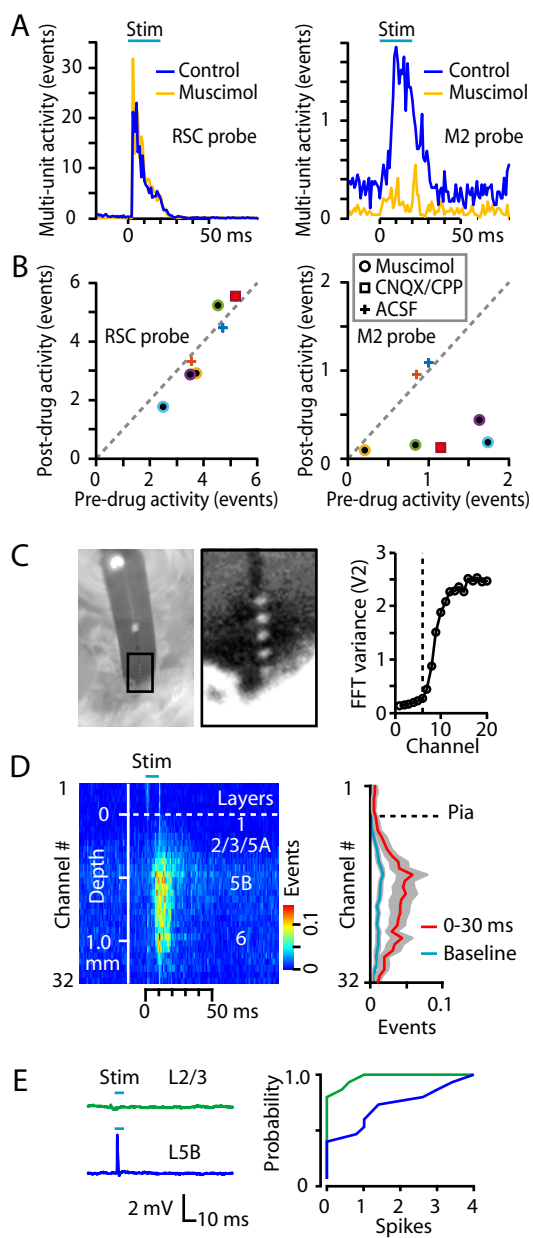

Figure 2

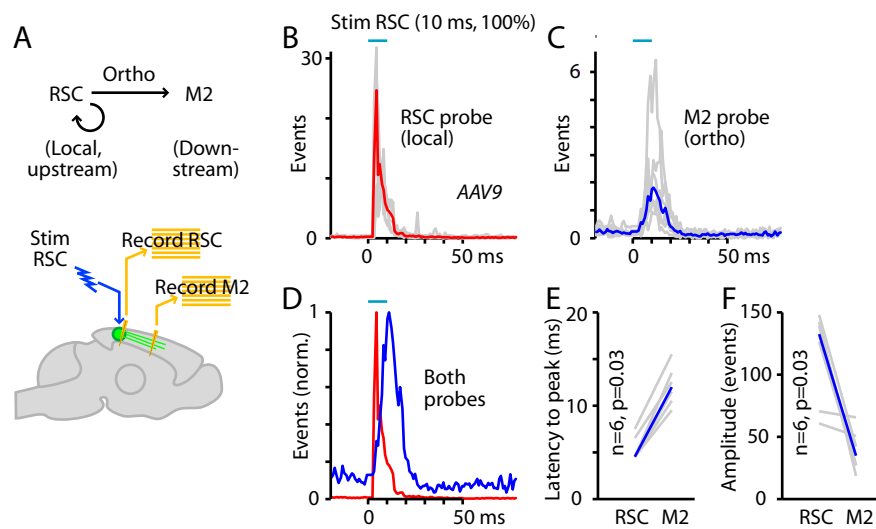

Figure 3

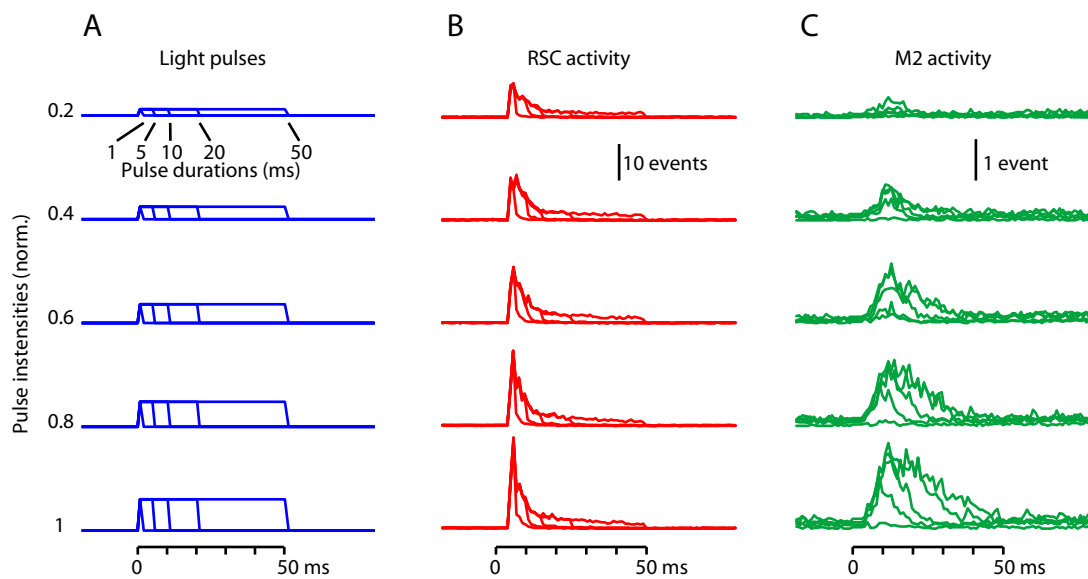

Figure 4

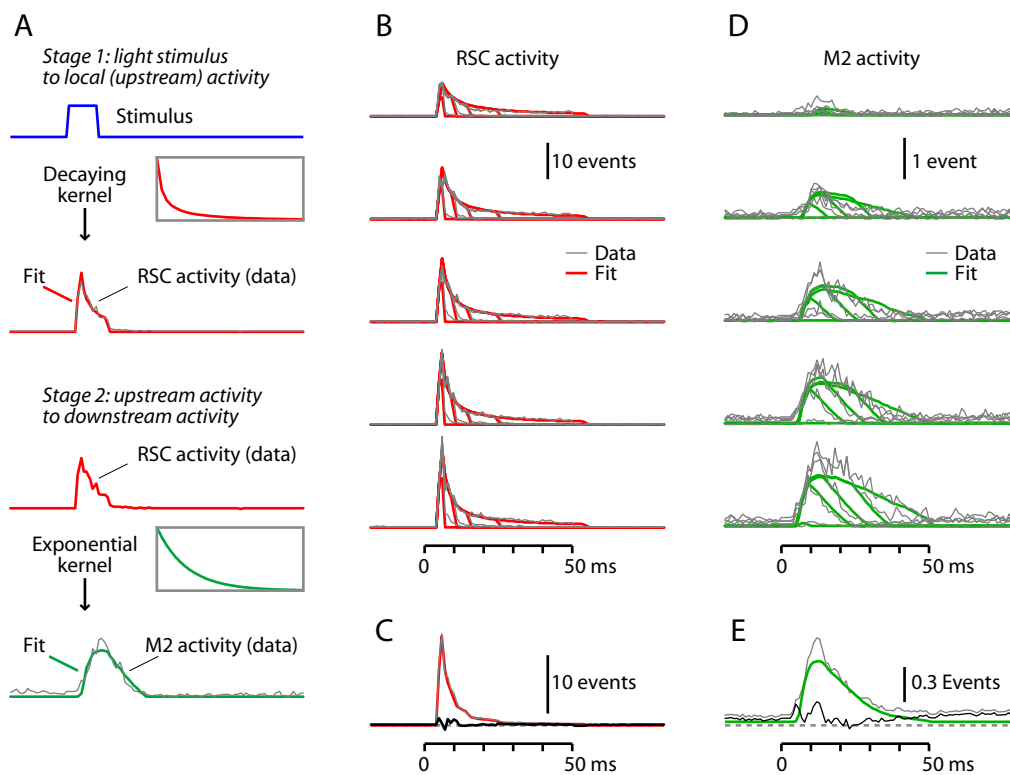

Figure 5

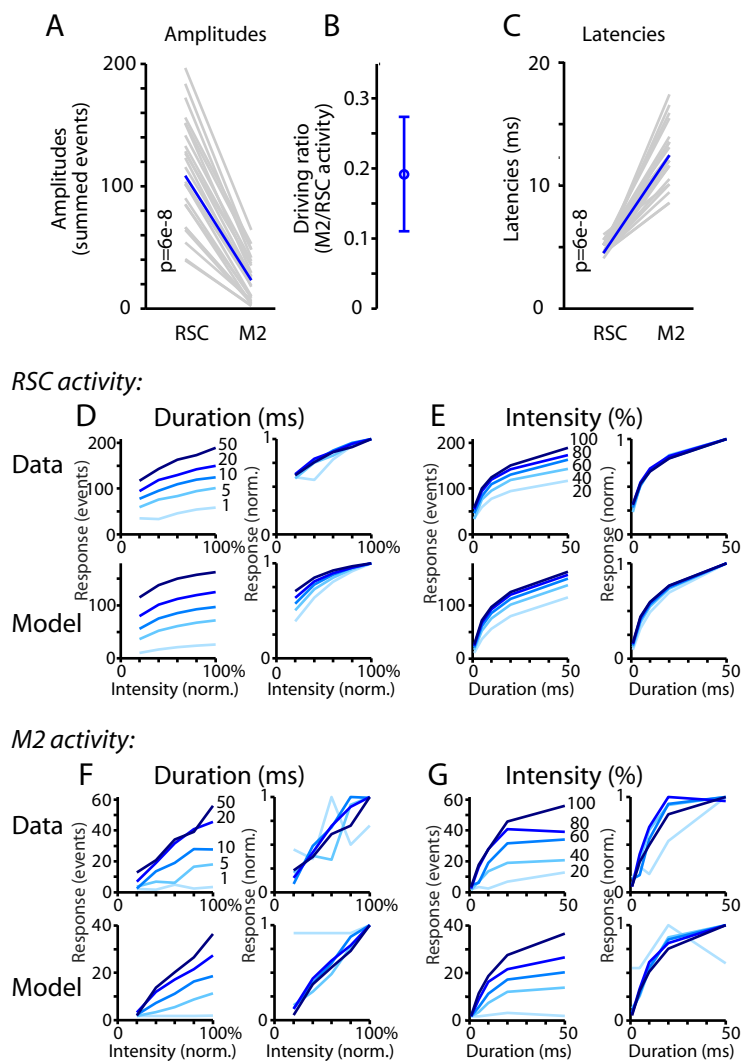

Figure 6

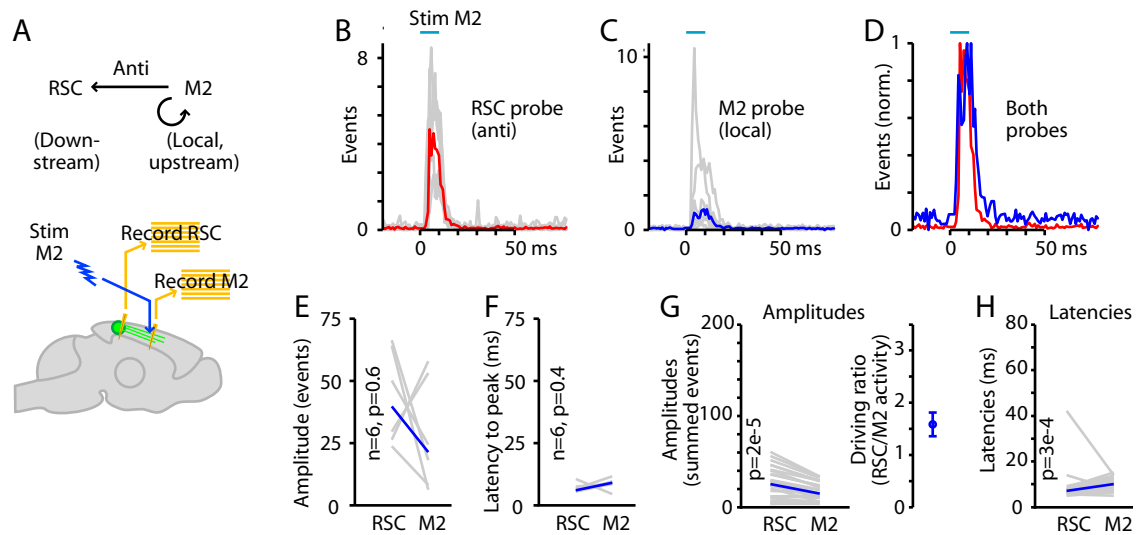

Source: http://biorxiv.org/content/10.1101/154914v2.full.pdf
